# Supplementary material
Source: ML conference proceedings conference paper supplement (https://openaccess.thecvf.com/content/CVPR2026/html/Zhang_Active_Perceptual_Inference_CVPR_2026_paper.html)
Supplement: Supplementary file 1 [file Zhang_Active_Perceptual_Inference_CVPR_2026_supplemental.pdf]

# Active Perceptual Inference: A Corticothalamic-Inspired Dynamic Nested Recurrent Network for Multimodal Sentiment Analysis with Incomplete Data

## Supplementary Material

### A. Additional Experiments and Analysis

#### A.1. Loss Weight Sensitivity Analysis

To assess the robustness of our proposed method, we conducted a hyperparameter sensitivity analysis on different datasets. During this process, all other training configurations remained unchanged. Detailed performance comparisons of different weight combinations on the MOSI, MOSEI, and SIMS datasets are presented in Table 4, Table 5, and Table 6, respectively. Empirical evidence indicates that the model exhibits good robustness and relative stability. Additionally, it is demonstrated that the precise calibration of loss weights is crucial for coordinating different learning objectives and maximizing model efficacy. We observed that due to inherent differences in data distributions and sample sizes, the optimal parameter values vary across datasets. Specifically, the model achieves peak performance with weight pairs  $(\alpha, \beta)$  set to (0.5, 0.1) for MOSI, (0.9, 10) for MOSEI, and (0.9, 0.1) for SIMS.

#### A.2. Detailed Performance under Different Missing Rates

Tables 7, 8, and 9 present a detailed comparison of DNRNet and baseline models under varying missing rates across the three benchmark datasets. According to the experimental findings, DNRNet achieves the best performance on the MOSI and MOSEI datasets in almost all missing rate settings, and also demonstrates highly competitive results on the SIMS dataset. Notably, models such as CENET and TETFN also exhibit relatively strong performance across specific metrics. A ubiquitous observation is that as the missing rate  $r$  increases, the performance of all evaluated models unfailingly declines, thus confirming the significant challenge posed by modality data incompleteness in multimodal sentiment analysis. This trend highlights the critical need for advanced mechanisms capable of mapping fragmented input representations back to a coherent semantic space. It also demonstrates the effectiveness of the brain-dynamic active perception and reasoning inspired recurrent nested network integrated within our model for handling severely incomplete data.

#### A.3. Classification Performance Visualization

We present the confusion matrices of a representative baseline model and DNRNet on the SIMS dataset under missing rates of 0.0, 0.1, 0.5, and 0.9. Detailed confusion matrices for each missing rate are shown in Figure 6. As the modality

Table 4. Effect of loss weighting on model performance on the MOSI dataset. Note: The lower MAE corresponds to superior results.

| MOSI            |              |              |                             |                      |              |              |
|-----------------|--------------|--------------|-----------------------------|----------------------|--------------|--------------|
| $\alpha, \beta$ | Acc-7        | Acc-5        | Acc-2                       | F1                   | MAE          | Corr         |
| 0.1, 0.5        | 34.84        | 39.02        | 73.68 / 72.41               | 74.15 / 72.47        | 1.054        | 0.524        |
| 0.1, 0.9        | 34.80        | <b>39.13</b> | 73.26 / 71.95               | 73.77 / 71.76        | 1.064        | 0.521        |
| 0.9, 0.1        | 34.96        | 38.94        | 74.12 / 72.92               | <b>74.28</b> / 73.20 | 1.043        | 0.529        |
| 0.9, 0.5        | 34.92        | 39.05        | 73.70 / 72.46               | 74.10 / 72.49        | 1.052        | 0.526        |
| 0.5, 0.1        | <b>35.36</b> | 39.11        | <b>74.22</b> / <b>73.19</b> | 74.24 / <b>73.28</b> | <b>1.036</b> | <b>0.538</b> |

Table 5. Effect of loss weighting on model performance on the MOSEI dataset. Note: The lower MAE corresponds to superior results.

| MOSEI           |              |              |                             |                             |              |              |
|-----------------|--------------|--------------|-----------------------------|-----------------------------|--------------|--------------|
| $\alpha, \beta$ | Acc-7        | Acc-5        | Acc-2                       | F1                          | MAE          | Corr         |
| 0.5, 0.1        | <b>46.98</b> | 47.70        | 77.96 / 78.25               | 78.65 / 79.97               | 0.670        | 0.586        |
| 0.1, 10         | 46.92        | 47.74        | 78.19 / 78.21               | 78.73 / 79.91               | 0.665        | 0.587        |
| 0.9, 5          | 46.96        | <b>47.90</b> | 77.89 / 78.20               | 78.49 / 79.99               | 0.670        | 0.590        |
| 0.1, 0.5        | 46.83        | 47.83        | 77.75 / 78.15               | 78.55 / 80.00               | 0.674        | 0.584        |
| 0.9, 10         | 46.89        | 47.84        | <b>78.28</b> / <b>78.89</b> | <b>78.74</b> / <b>80.18</b> | <b>0.655</b> | <b>0.590</b> |

Table 6. Effect of loss weighting on model performance on the SIMS dataset. Note: The lower MAE corresponds to superior results.

| SIMS            |              |              |              |              |              |              |
|-----------------|--------------|--------------|--------------|--------------|--------------|--------------|
| $\alpha, \beta$ | Acc-5        | Acc-3        | Acc-2        | F1           | MAE          | Corr         |
| 0.1, 0.5        | 35.70        | 58.54        | 73.94        | <b>78.55</b> | 0.510        | 0.385        |
| 0.1, 0.9        | <b>35.96</b> | 59.41        | <b>74.62</b> | 76.74        | 0.508        | 0.390        |
| 0.5, 0.1        | 35.70        | 58.54        | 73.96        | 78.54        | 0.510        | 0.385        |
| 0.9, 0.5        | 35.95        | 59.34        | 73.57        | 76.74        | 0.508        | 0.390        |
| 0.9, 0.1        | 35.71        | <b>59.54</b> | 73.82        | 77.50        | <b>0.498</b> | <b>0.416</b> |

missing rate increases, the baseline model exhibits a significant class prediction bias, showing a pronounced tendency to collapse toward the weakly negative class. This suggests an excessive dependence on the single, dominant class under conditions of severe modality sparsity. In sharp contrast, DNRNet successfully maintains its predictions distributed across multiple sentiment categories even at the highest missing rates ( $r = 0.9$ ), thereby demonstrating superior discriminative capacity. These observations are consistent with the performance trends observed on the MOSI

Table 7. Robustness comparison of the overall performance on MOSI datasets. Note: The lower MAE corresponds to superior results.

| Method                        | Acc-7        | Acc-5        | Acc-2                       | F1                          | MAE          | Corr         | Method                        | Acc-7        | Acc-5        | Acc-2                       | F1                          | MAE          | Corr         |
|-------------------------------|--------------|--------------|-----------------------------|-----------------------------|--------------|--------------|-------------------------------|--------------|--------------|-----------------------------|-----------------------------|--------------|--------------|
| Random Missing Rate $r = 0$   |              |              |                             |                             |              |              | Random Missing Rate $r = 0.5$ |              |              |                             |                             |              |              |
| MISA                          | 43.05        | 48.30        | 82.78 / 81.24               | 82.83 / 81.23               | 0.771        | 0.777        | MISA                          | 28.14        | 30.61        | 70.53 / 69.34               | 70.50 / 69.20               | 1.124        | 0.519        |
| Self-MM                       | 42.81        | 52.38        | 85.22 / 83.24               | 85.19 / 83.26               | 0.720        | 0.790        | Self-MM                       | 26.97        | 31.39        | 67.43 / 67.54               | 64.27 / 66.81               | 1.129        | 0.503        |
| MMIM                          | 45.92        | 49.85        | 83.43 / 81.97               | 83.43 / 81.94               | 0.744        | 0.778        | MMIM                          | 28.33        | 29.89        | 68.09 / 66.52               | 66.15 / 64.59               | 1.128        | 0.501        |
| CENET                         | 43.20        | 50.39        | 83.08 / 81.49               | 83.06 / 81.48               | 0.748        | 0.785        | CENET                         | 28.33        | 30.90        | 72.46 / 66.08               | 71.10 / 63.50               | 1.130        | 0.496        |
| TETFN                         | 44.07        | 51.31        | 82.62 / 81.10               | 82.67 / 81.09               | <b>0.719</b> | <b>0.794</b> | TETFN                         | 27.55        | 31.34        | 67.23 / 65.06               | 64.30 / 61.78               | 1.157        | 0.492        |
| TFR-Net                       | 40.82        | 47.91        | 83.64 / 81.68               | 83.57 / 81.61               | 0.805        | 0.760        | TFR-Net                       | 25.85        | 30.71        | 64.83 / 63.02               | 58.04 / 56.64               | 1.270        | 0.443        |
| ALMT                          | 42.37        | 48.49        | 84.91 / 82.75               | 85.01 / 82.94               | 0.752        | 0.768        | ALMT                          | 28.42        | 31.25        | 68.24 / 65.94               | 69.74 / 68.54               | 1.138        | 0.485        |
| LNLN                          | 44.56        | 49.76        | 84.25 / 81.24               | 84.61 / 81.79               | 0.751        | 0.778        | LNLN                          | <b>33.92</b> | <b>38.39</b> | <b>73.37</b> / 71.86        | <b>73.70</b> / 72.30        | <b>1.059</b> | <b>0.536</b> |
| P-RMF                         | 44.31        | 48.83        | 84.15 / 82.65               | 84.37 / 82.69               | 0.726        | 0.782        | P-RMF                         | 33.67        | 37.90        | 73.02 / 71.28               | 73.33 / 71.66               | 1.077        | 0.523        |
| <b>DNRNet</b>                 | <b>46.06</b> | <b>52.77</b> | <b>86.13</b> / <b>84.69</b> | <b>86.18</b> / <b>84.77</b> | 0.726        | 0.788        | <b>DNRNet</b>                 | 33.53        | 37.46        | 73.32 / <b>72.59</b>        | 73.24 / <b>72.59</b>        | 1.060        | <b>0.553</b> |
| Random Missing Rate $r = 0.1$ |              |              |                             |                             |              |              | Random Missing Rate $r = 0.6$ |              |              |                             |                             |              |              |
| MISA                          | 40.28        | 46.21        | 80.18 / 79.01               | 80.21 / 78.97               | 0.847        | 0.721        | MISA                          | 24.68        | 27.12        | 66.97 / 65.84               | 66.94 / 65.69               | 1.200        | 0.441        |
| Self-MM                       | 40.33        | <b>49.03</b> | 81.40 / 80.03               | 81.19 / 80.03               | 0.812        | 0.728        | Self-MM                       | 24.34        | 27.31        | 63.47 / 63.36               | 58.94 / 62.07               | 1.209        | 0.425        |
| MMIM                          | 42.61        | 46.65        | 79.98 / 78.13               | 79.83 / 77.99               | 0.825        | 0.718        | MMIM                          | 25.41        | 27.11        | 63.67 / 62.49               | 60.87 / 59.48               | 1.208        | 0.418        |
| CENET                         | 40.13        | 46.60        | 80.08 / 78.38               | 79.91 / 78.20               | 0.837        | 0.719        | CENET                         | 24.54        | 26.53        | 67.58 / 61.47               | 64.87 / 57.86               | 1.215        | 0.415        |
| TETFN                         | 40.67        | 46.84        | 80.59 / 78.91               | 80.55 / 78.79               | 0.805        | 0.731        | TETFN                         | 25.12        | 27.99        | 64.42 / 61.23               | 58.68 / 56.08               | 1.238        | 0.417        |
| TFR-Net                       | 38.63        | 45.82        | 79.27 / 77.99               | 78.70 / 77.61               | 0.872        | 0.705        | TFR-Net                       | 24.05        | 28.33        | 61.64 / 59.47               | 52.44 / 50.53               | 1.371        | 0.363        |
| ALMT                          | 39.84        | 45.48        | 80.90 / 78.67               | 81.15 / 79.08               | 0.843        | 0.703        | ALMT                          | 25.41        | 27.36        | 64.53 / 62.15               | 66.81 / 65.87               | 1.214        | 0.407        |
| LNLN                          | 42.37        | 47.91        | 81.20 / 78.43               | 81.62 / 79.04               | 0.820        | 0.724        | LNLN                          | 30.37        | 34.35        | 69.00 / 67.69               | 69.19 / 67.99               | 1.147        | 0.458        |
| P-RMF                         | 42.13        | 47.52        | 82.62 / 81.34               | 82.89 / <b>81.35</b>        | 0.800        | 0.730        | P-RMF                         | 29.30        | 33.24        | 68.75 / 67.35               | 68.64 / 67.64               | 1.147        | 0.432        |
| <b>DNRNet</b>                 | <b>43.15</b> | 48.83        | <b>84.45</b> / <b>83.38</b> | <b>84.45</b> / <b>83.42</b> | 0.802        | <b>0.736</b> | <b>DNRNet</b>                 | <b>32.80</b> | <b>35.57</b> | <b>69.82</b> / <b>69.53</b> | <b>69.67</b> / <b>69.49</b> | <b>1.133</b> | <b>0.470</b> |
| Random Missing Rate $r = 0.2$ |              |              |                             |                             |              |              | Random Missing Rate $r = 0.7$ |              |              |                             |                             |              |              |
| MISA                          | 36.25        | 41.55        | 77.54 / 76.34               | 77.58 / 76.30               | 0.939        | 0.654        | MISA                          | 21.14        | 23.27        | 65.09 / 63.89               | 65.07 / 63.74               | 1.257        | 0.381        |
| Self-MM                       | 36.64        | 43.98        | 78.15 / 76.48               | 77.76 / 76.51               | 0.901        | 0.660        | Self-MM                       | 20.70        | 23.81        | 61.74 / 61.46               | 55.11 / 58.97               | 1.271        | 0.339        |
| MMIM                          | 39.07        | 42.66        | 76.42 / 74.54               | 76.12 / 74.22               | 0.918        | 0.651        | MMIM                          | 22.35        | 24.00        | 61.23 / 59.18               | 57.15 / 54.36               | 1.267        | 0.342        |
| CENET                         | 38.00        | 42.32        | 77.49 / 74.64               | 77.35 / 74.28               | 0.916        | 0.654        | CENET                         | 22.35        | 59.86        | 63.82 / 59.43               | 53.79 / 54.22               | 1.269        | 0.335        |
| TETFN                         | 35.81        | 41.79        | 77.49 / 75.60               | 77.35 / 75.35               | 0.910        | 0.657        | TETFN                         | 23.13        | 25.27        | 61.13 / 58.65               | 53.79 / 50.77               | 1.293        | 0.337        |
| TFR-Net                       | 34.70        | 40.13        | 74.70 / 73.52               | 73.57 / 72.70               | 0.987        | 0.622        | TFR-Net                       | 23.71        | 26.92        | 59.91 / 57.34               | 48.41 / 45.48               | 1.454        | 0.276        |
| ALMT                          | 35.33        | 40.33        | 77.64 / 75.70               | 77.94 / 76.24               | 0.927        | 0.645        | ALMT                          | 23.71        | 24.97        | 61.84 / 59.67               | 65.30 / 65.19               | 1.266        | 0.336        |
| LNLN                          | 39.74        | 45.14        | 79.22 / 76.87               | 79.53 / 77.34               | 0.891        | 0.668        | LNLN                          | 27.79        | 31.19        | 65.95 / 65.01               | <b>65.95</b> / 65.14        | <b>1.219</b> | 0.383        |
| P-RMF                         | 40.38        | 44.75        | 79.57 / 78.13               | 80.97 / 78.11               | <b>0.853</b> | 0.668        | P-RMF                         | 27.84        | <b>32.94</b> | <b>66.16</b> / 65.16        | 64.69 / 65.33               | 1.229        | <b>0.383</b> |
| <b>DNRNet</b>                 | <b>40.38</b> | <b>45.48</b> | <b>82.47</b> / <b>81.20</b> | <b>82.51</b> / <b>81.28</b> | 0.885        | <b>0.677</b> | <b>DNRNet</b>                 | <b>29.30</b> | 30.61        | 66.01 / <b>65.60</b>        | 65.87 / <b>65.59</b>        | 1.225        | 0.379        |
| Random Missing Rate $r = 0.3$ |              |              |                             |                             |              |              | Random Missing Rate $r = 0.8$ |              |              |                             |                             |              |              |
| MISA                          | 34.60        | 38.97        | 75.76 / 74.54               | 75.82 / 74.51               | 0.989        | 0.618        | MISA                          | 19.92        | 20.99        | <b>63.56</b> / <b>62.24</b> | 63.16 / 61.67               | 1.311        | 0.321        |
| Self-MM                       | 34.89        | 40.67        | 76.37 / 74.98               | 75.68 / 74.94               | 0.967        | 0.614        | Self-MM                       | 19.29        | 22.11        | 59.55 / 58.26               | 49.98 / 53.56               | 1.313        | 0.282        |
| MMIM                          | 36.83        | 40.43        | 74.08 / 71.91               | 73.47 / 71.28               | 0.974        | 0.612        | MMIM                          | 20.26        | 21.77        | 58.33 / 55.30               | 52.46 / 47.89               | 1.312        | 0.287        |
| CENET                         | 34.74        | 38.97        | 76.83 / 72.01               | 76.56 / 71.30               | 0.983        | 0.605        | CENET                         | 21.14        | 21.67        | 60.93 / 57.53               | 54.68 / 50.80               | 1.314        | 0.274        |
| TETFN                         | 33.24        | 38.58        | 75.25 / 73.42               | 74.77 / 72.78               | 0.982        | 0.607        | TETFN                         | 22.01        | 23.76        | 59.40 / 56.85               | 48.73 / 45.59               | 1.337        | 0.274        |
| TFR-Net                       | 32.55        | 38.34        | 72.36 / 71.28               | 70.12 / 69.58               | 1.065        | 0.572        | TFR-Net                       | 23.23        | 27.70        | 58.49 / 55.98               | 44.70 / 41.88               | 1.497        | 0.155        |
| ALMT                          | 33.04        | 37.17        | 75.15 / 72.94               | 75.51 / 73.66               | 0.992        | 0.596        | ALMT                          | 23.13        | 23.66        | 60.37 / 58.31               | <b>65.45</b> / <b>66.14</b> | 1.310        | 0.273        |
| LNLN                          | 38.00        | 42.81        | 77.29 / 75.46               | 77.56 / 75.68               | 0.953        | 0.617        | LNLN                          | 26.34        | 28.23        | 62.75 / 62.10               | 62.56 / 62.03               | 1.283        | 0.314        |
| P-RMF                         | 39.21        | 42.71        | 76.83 / 75.80               | 79.27 / 75.82               | <b>0.922</b> | 0.621        | P-RMF                         | 25.97        | <b>29.74</b> | 62.04 / 61.08               | 60.76 / 61.22               | <b>1.275</b> | 0.316        |
| <b>DNRNet</b>                 | <b>39.50</b> | <b>44.46</b> | <b>79.42</b> / <b>78.28</b> | <b>79.56</b> / <b>78.26</b> | 0.933        | <b>0.630</b> | <b>DNRNet</b>                 | <b>26.38</b> | 28.13        | 62.65 / 61.95               | 62.47 / 61.90               | 1.281        | <b>0.323</b> |
| Random Missing Rate $r = 0.4$ |              |              |                             |                             |              |              | Random Missing Rate $r = 0.9$ |              |              |                             |                             |              |              |
| MISA                          | 32.65        | 35.37        | 73.88 / 72.59               | 73.88 / 72.49               | 1.041        | 0.585        | MISA                          | 17.7         | 18.4         | 58.64 / 58.21               | 56.84 / 56.19               | 1.369        | <b>0.226</b> |
| Self-MM                       | 31.20        | 36.30        | 73.17 / 71.96               | 71.74 / 71.75               | 1.027        | 0.579        | Self-MM                       | 18.32        | 19.78        | 58.59 / 55.25               | 46.16 / 47.46               | 1.353        | 0.197        |
| MMIM                          | 33.38        | 35.76        | 70.84 / 68.90               | 69.69 / 67.80               | 1.034        | 0.576        | MMIM                          | 18.95        | 19.53        | 55.29 / 51.65               | 47.33 / 40.89               | 1.357        | 0.186        |
| CENET                         | 32.26        | 36.15        | 73.38 / 71.53               | 72.75 / 70.26               | 1.031        | 0.574        | CENET                         | 19.15        | 19.10        | 58.99 / 54.76               | 50.01 / 46.58               | 1.357        | 0.181        |
| TETFN                         | 30.66        | 35.28        | 72.05 / 70.07               | 70.79 / 68.58               | 1.051        | 0.571        | TETFN                         | 20.75        | 21.19        | 58.43 / 55.88               | 45.24 / 42.12               | 1.378        | 0.186        |
| TFR-Net                       | 30.17        | 35.76        | 68.75 / 67.74               | 64.71 / 64.41               | 1.142        | 0.537        | TFR-Net                       | 21.67        | 25.12        | 57.93 / 55.44               | 43.01 / 40.18               | 1.534        | 0.155        |
| ALMT                          | 31.44        | 35.03        | 73.12 / 71.14               | 73.85 / 72.47               | 1.045        | 0.560        | ALMT                          | 20.31        | 20.50        | 57.32 / 56.66               | <b>64.92</b> / <b>67.82</b> | 1.349        | 0.205        |
| LNLN                          | 36.49        | 41.11        | 76.01 / 74.25               | 76.31 / 74.67               | 0.987        | 0.594        | LNLN                          | 22.98        | 23.86        | 56.50 / 56.51               | 56.32 / 56.47               | 1.349        | 0.202        |
| P-RMF                         | 35.59        | 40.67        | 75.46 / 73.76               | 77.71 / 74.09               | 1.001        | 0.584        | P-RMF                         | 23.49        | <b>26.68</b> | 59.45 / <b>58.75</b>        | 56.66 / 59.01               | <b>1.346</b> | 0.212        |
| <b>DNRNet</b>                 | <b>38.05</b> | <b>41.98</b> | <b>78.05</b> / <b>76.38</b> | <b>78.19</b> / <b>76.62</b> | <b>0.970</b> | <b>0.612</b> | <b>DNRNet</b>                 | <b>24.49</b> | 25.80        | <b>59.91</b> / 58.31        | 60.28 / 58.90               | 1.349        | 0.215        |

dataset, which further validates the robustness and stability of DNRNet when faced with extreme data incompleteness.

Table 8. Robustness comparison of the overall performance on MOSEI datasets. Note: The lower MAE corresponds to superior results.

| Method                        | Acc-7        | Acc-5        | Acc-2                       | F1                          | MAE          | Corr         | Method                        | Acc-7        | Acc-5        | Acc-2                       | F1                          | MAE          | Corr         |
|-------------------------------|--------------|--------------|-----------------------------|-----------------------------|--------------|--------------|-------------------------------|--------------|--------------|-----------------------------|-----------------------------|--------------|--------------|
| Random Missing Rate $r = 0$   |              |              |                             |                             |              |              | Random Missing Rate $r = 0.5$ |              |              |                             |                             |              |              |
| MISA                          | 51.79        | 53.85        | 85.28 / 84.10               | 85.10 / 83.75               | 0.552        | 0.759        | MISA                          | 38.12        | 36.05        | 67.38 / 73.21               | 58.38 / 64.14               | 0.834        | 0.492        |
| Self-MM                       | 53.89        | 55.72        | 85.34 / <b>84.68</b>        | 85.11 / 84.66               | 0.531        | 0.764        | Self-MM                       | 42.70        | 43.14        | 71.97 / 75.81               | 67.40 / 70.38               | 0.733        | 0.477        |
| MMIM                          | 50.76        | 53.04        | 83.53 / 81.65               | 83.39 / 81.41               | 0.576        | 0.724        | MMIM                          | 38.68        | 39.21        | 71.75 / 74.45               | 67.70 / 67.96               | 0.775        | 0.470        |
| CENET                         | <b>54.39</b> | <b>56.12</b> | 85.49 / 82.30               | 85.41 / 82.60               | <b>0.531</b> | 0.770        | CENET                         | 45.12        | 45.52        | 73.33 / 77.16               | 69.80 / 74.14               | 0.720        | 0.515        |
| TETFN                         | 44.07        | 55.96        | 82.62 / 81.10               | 82.67 / 81.09               | 0.719        | <b>0.794</b> | TETFN                         | 27.55        | 45.63        | 67.23 / 65.06               | 64.30 / 61.78               | 1.157        | 0.492        |
| TFR-Net                       | 53.71        | 47.91        | 84.96 / 84.65               | 84.71 / 84.34               | 0.550        | 0.745        | TFR-Net                       | 45.00        | 30.71        | 71.53 / 75.69               | 66.88 / 70.07               | 0.730        | 0.471        |
| ALMT                          | 52.18        | 53.89        | <b>85.62</b> / 83.99        | <b>85.69</b> / 84.53        | 0.542        | 0.752        | ALMT                          | 37.82        | 38.34        | 77.40 / 77.48               | 77.73 / 77.80               | 0.683        | 0.461        |
| LNLN                          | 50.66        | 51.94        | 84.14 / 83.61               | 84.53 / 84.02               | 0.572        | 0.735        | LNLN                          | 44.90        | 45.59        | 76.44 / 78.10               | 77.23 / 79.30               | 0.710        | 0.529        |
| P-RMF                         | 49.77        | 52.09        | 85.20 / 83.62               | 85.48 / 83.68               | 0.539        | 0.767        | P-RMF                         | 43.94        | 44.90        | 78.62 / 78.64               | <b>79.49</b> / 79.74        | 0.666        | <b>0.601</b> |
| <b>DNRNet</b>                 | 52.46        | 54.07        | 85.28 / 84.12               | 85.53 / <b>84.67</b>        | 0.534        | 0.787        | <b>DNRNet</b>                 | <b>45.57</b> | <b>46.51</b> | <b>78.87</b> / <b>78.92</b> | 79.25 / <b>79.99</b>        | <b>0.661</b> | 0.588        |
| Random Missing Rate $r = 0.1$ |              |              |                             |                             |              |              | Random Missing Rate $r = 0.6$ |              |              |                             |                             |              |              |
| MISA                          | 50.13        | 51.34        | 82.21 / 82.28               | 81.28 / 80.79               | 0.598        | 0.722        | MISA                          | 36.16        | 33.30        | 65.55 / 72.30               | 54.64 / 62.12               | 0.875        | 0.415        |
| Self-MM                       | 51.80        | 53.18        | 83.03 / <b>83.79</b>        | 82.43 / 83.23               | 0.564        | 0.725        | Self-MM                       | 41.47        | 41.75        | 69.33 / 73.93               | 63.01 / 66.76               | 0.762        | 0.401        |
| MMIM                          | 49.09        | 51.19        | 82.00 / 81.09               | 81.57 / 80.15               | 0.602        | 0.696        | MMIM                          | 37.13        | 37.48        | 68.83 / 73.16               | 63.09 / 65.43               | 0.808        | 0.402        |
| CENET                         | <b>52.83</b> | 54.23        | 83.75 / 82.41               | 83.42 / 82.34               | 0.556        | 0.739        | CENET                         | 44.45        | 44.64        | 70.50 / 75.39               | 65.27 / 70.86               | 0.749        | 0.446        |
| TETFN                         | 40.67        | <b>54.28</b> | 80.59 / 78.91               | 80.55 / 78.79               | 0.805        | 0.731        | TETFN                         | 25.12        | 44.07        | 63.42 / 61.23               | 58.68 / 56.08               | 1.238        | 0.417        |
| TFR-Net                       | 52.29        | 45.82        | 82.92 / 83.31               | 82.25 / 82.40               | 0.573        | 0.715        | TFR-Net                       | 43.88        | 28.33        | 68.80 / 74.05               | 62.51 / 67.07               | 0.762        | 0.397        |
| ALMT                          | 49.98        | 51.38        | 84.14 / 82.84               | 84.23 / 83.04               | 0.583        | 0.718        | ALMT                          | 35.99        | 36.30        | 74.98 / 76.26               | 75.44 / 76.71               | 0.710        | 0.395        |
| LNLN                          | 49.96        | 51.25        | 83.32 / 82.73               | 83.66 / 82.91               | 0.591        | 0.712        | LNLN                          | 43.52        | 44.00        | 73.82 / 76.50               | 75.03 / 78.33               | 0.736        | 0.471        |
| P-RMF                         | 49.04        | 51.45        | 83.98 / 82.79               | <b>84.37</b> / 82.94        | 0.556        | <b>0.748</b> | P-RMF                         | 42.26        | 43.12        | 76.11 / <b>77.44</b>        | <b>77.58</b> / <b>78.97</b> | 0.703        | <b>0.545</b> |
| <b>DNRNet</b>                 | 51.49        | 53.21        | <b>84.26</b> / 83.67        | 84.28 / <b>84.18</b>        | <b>0.543</b> | 0.741        | <b>DNRNet</b>                 | <b>44.88</b> | <b>45.52</b> | <b>76.31</b> / 76.88        | 76.60 / 78.30               | <b>0.700</b> | 0.536        |
| Random Missing Rate $r = 0.2$ |              |              |                             |                             |              |              | Random Missing Rate $r = 0.7$ |              |              |                             |                             |              |              |
| MISA                          | 47.24        | 47.66        | 77.84 / 79.93               | 75.56 / 76.88               | 0.659        | 0.674        | MISA                          | 34.54        | 31.21        | 64.28 / 71.71               | 51.82 / 60.65               | 0.906        | 0.344        |
| Self-MM                       | 49.44        | 50.51        | 80.84 / 82.33               | 79.76 / 81.17               | 0.604        | 0.678        | Self-MM                       | 39.93        | 40.12        | 66.79 / 72.55               | 58.05 / 63.45               | 0.786        | 0.329        |
| MMIM                          | 46.27        | 47.99        | 79.93 / 79.66               | 79.08 / 77.68               | 0.642        | 0.653        | MMIM                          | 35.25        | 35.47        | 66.89 / 72.26               | 58.90 / 63.26               | 0.834        | 0.341        |
| CENET                         | 50.72        | 51.85        | 81.46 / 81.62               | 80.78 / 81.17               | 0.590        | 0.698        | CENET                         | 43.93        | 44.03        | 67.50 / 73.39               | 59.88 / 67.02               | 0.776        | 0.384        |
| TETFN                         | 35.81        | <b>52.35</b> | 77.49 / 75.60               | 77.35 / 75.35               | 0.910        | 0.657        | TETFN                         | 23.13        | 43.15        | 61.13 / 58.65               | 53.79 / 50.77               | 1.293        | 0.337        |
| TFR-Net                       | <b>51.04</b> | 40.13        | 80.47 / 81.61               | 79.29 / 79.99               | 0.604        | 0.672        | TFR-Net                       | 42.91        | 26.92        | 66.64 / 72.77               | 58.32 / 64.02               | 0.786        | 0.322        |
| ALMT                          | 46.61        | 47.82        | 82.71 / 81.65               | 82.82 / 81.83               | 0.607        | 0.669        | ALMT                          | 34.78        | 34.95        | 71.62 / 73.98               | 72.24 / 74.54               | 0.743        | 0.315        |
| LNLN                          | 48.75        | 49.95        | 81.70 / 81.68               | 81.95 / 81.89               | 0.616        | 0.677        | LNLN                          | 42.22        | 42.56        | 71.55 / 74.74               | 73.49 / 77.40               | 0.762        | 0.408        |
| P-RMF                         | 47.91        | 49.35        | 82.97 / 82.25               | <b>83.37</b> / 82.58        | 0.576        | <b>0.722</b> | P-RMF                         | 41.73        | 42.41        | <b>74.64</b> / <b>75.87</b> | <b>75.88</b> / <b>78.12</b> | <b>0.733</b> | <b>0.481</b> |
| <b>DNRNet</b>                 | 50.29        | 51.62        | <b>83.05</b> / <b>83.17</b> | 83.08 / <b>83.79</b>        | <b>0.572</b> | 0.714        | <b>DNRNet</b>                 | <b>43.40</b> | <b>44.02</b> | 73.28 / 75.08               | 73.72 / 76.77               | 0.736        | 0.477        |
| Random Missing Rate $r = 0.3$ |              |              |                             |                             |              |              | Random Missing Rate $r = 0.8$ |              |              |                             |                             |              |              |
| MISA                          | 43.99        | 43.40        | 73.32 / 77.28               | 68.91 / 72.25               | 0.724        | 0.615        | MISA                          | 33.29        | 29.51        | 63.43 / 71.30               | 49.95 / 59.69               | 0.927        | 0.267        |
| Self-MM                       | 47.23        | 48.07        | 77.63 / 79.99               | 75.69 / 77.74               | 0.653        | 0.610        | Self-MM                       | 38.69        | 38.78        | 65.07 / 71.83               | 54.44 / 61.49               | 0.805        | 0.259        |
| MMIM                          | 43.25        | 44.73        | 77.08 / 77.79               | 75.46 / 74.49               | 0.690        | 0.597        | MMIM                          | 33.64        | 33.71        | 64.97 / 71.57               | 54.76 / 61.45               | 0.858        | 0.269        |
| CENET                         | 48.49        | 49.37        | 78.65 / 80.02               | 77.34 / 78.94               | 0.636        | 0.640        | CENET                         | 42.71        | 42.74        | 65.88 / 72.16               | 56.80 / 64.67               | 0.798        | 0.316        |
| TETFN                         | 33.24        | <b>50.23</b> | 75.25 / 73.42               | 74.77 / 72.78               | 0.982        | 0.607        | TETFN                         | 22.01        | 42.11        | 59.40 / 56.85               | 48.73 / 45.59               | 1.337        | 0.274        |
| TFR-Net                       | <b>48.75</b> | 38.34        | 77.48 / 79.29               | 75.43 / 76.52               | 0.650        | 0.604        | TFR-Net                       | 42.23        | 27.70        | 65.05 / 71.95               | 54.91 / 61.82               | 0.807        | 0.241        |
| ALMT                          | 43.04        | 44.05        | 80.94 / 79.94               | 81.15 / 80.20               | 0.632        | 0.598        | ALMT                          | 34.01        | 34.09        | 68.15 / 71.48               | 69.12 / 72.28               | 0.774        | 0.231        |
| LNLN                          | 47.36        | 48.40        | 80.11 / 80.45               | 80.44 / 80.91               | 0.648        | 0.629        | LNLN                          | 40.76        | 40.97        | 68.62 / 72.86               | 71.83 / 76.80               | 0.791        | 0.325        |
| P-RMF                         | 45.95        | 47.78        | 81.26 / 80.88               | <b>81.86</b> / 81.40        | 0.611        | <b>0.683</b> | P-RMF                         | 40.46        | 41.00        | 70.75 / <b>74.46</b>        | <b>73.03</b> / <b>77.91</b> | 0.764        | 0.401        |
| <b>DNRNet</b>                 | 48.44        | 50.07        | <b>81.59</b> / <b>81.07</b> | 81.83 / <b>81.41</b>        | <b>0.601</b> | 0.673        | <b>DNRNet</b>                 | <b>42.86</b> | <b>42.88</b> | 71.24 / 73.58               | 72.01 / 76.03               | <b>0.763</b> | <b>0.415</b> |
| Random Missing Rate $r = 0.4$ |              |              |                             |                             |              |              | Random Missing Rate $r = 0.9$ |              |              |                             |                             |              |              |
| MISA                          | 40.87        | 39.53        | 70.46 / 75.04               | 64.02 / 67.93               | 0.780        | 0.561        | MISA                          | 32.29        | 28.03        | 62.95 / 71.07               | 48.80 / 59.12               | 0.941        | 0.180        |
| Self-MM                       | 44.40        | 45.04        | 75.02 / 78.09               | 72.01 / 74.48               | 0.694        | 0.554        | Self-MM                       | 37.46        | 37.50        | 63.85 / 71.24               | 51.32 / 59.72               | 0.821        | 0.188        |
| MMIM                          | 40.84        | 41.86        | 74.56 / 76.15               | 71.98 / 71.40               | 0.732        | 0.542        | MMIM                          | 32.61        | 32.67        | 63.69 / 71.10               | 51.26 / 59.99               | 0.877        | 0.197        |
| CENET                         | 47.12        | 47.74        | 76.03 / 78.57               | 73.87 / 76.75               | 0.678        | 0.587        | CENET                         | 42.08        | <b>42.08</b> | 64.14 / 70.42               | 54.27 / 62.33               | 0.814        | 0.254        |
| TETFN                         | 30.66        | 47.62        | 72.05 / 70.07               | 70.79 / 68.58               | 1.051        | 0.571        | TETFN                         | 20.75        | 41.55        | 58.43 / 55.88               | 45.24 / 42.12               | 1.378        | 0.186        |
| TFR-Net                       | 46.70        | 35.76        | 74.74 / 77.65               | 71.67 / 73.71               | 0.688        | 0.548        | TFR-Net                       | 41.73        | 25.12        | 63.64 / 71.34               | 52.02 / 59.99               | 0.820        | 0.175        |
| ALMT                          | 40.40        | 41.21        | 79.40 / 79.16               | 79.68 / 79.50               | 0.651        | 0.536        | ALMT                          | 34.40        | 34.40        | 61.41 / 68.65               | 63.32 / 69.83               | 0.810        | 0.138        |
| LNLN                          | 45.99        | 46.88        | 78.49 / 79.70               | 78.98 / 80.46               | 0.673        | 0.592        | LNLN                          | 40.10        | 40.19        | 64.83 / 71.51               | 70.60 / 77.52               | 0.820        | 0.221        |
| P-RMF                         | 45.59        | 46.73        | 79.97 / 79.76               | 80.74 / 80.58               | <b>0.631</b> | <b>0.653</b> | P-RMF                         | 39.62        | 39.90        | <b>67.86</b> / <b>72.59</b> | <b>71.51</b> / <b>77.95</b> | 0.805        | 0.289        |
| <b>DNRNet</b>                 | <b>47.50</b> | <b>48.36</b> | <b>81.26</b> / <b>80.30</b> | <b>81.41</b> / <b>80.64</b> | 0.637        | 0.643        | <b>DNRNet</b>                 | <b>42.15</b> | 42.05        | 67.64 / 72.10               | 69.66 / 75.99               | <b>0.801</b> | <b>0.322</b> |

#### A.4. Sensitivity Analysis of Cycle Number

To further investigate the effectiveness of the iterative completion mechanism, we analyzed the impact of the num-

ber of iterations ( $n$ ) on the model's regression performance. Specifically, we conducted experiments on the

Table 9. Robustness comparison of the overall performance on SIMS datasets. Note: The lower MAE corresponds to superior results.

| Method                        | Acc-5        | Acc-3        | Acc-2        | F1           | MAE          | Corr         | Method                        | Acc-5        | Acc-3        | Acc-2        | F1           | MAE          | Corr         |
|-------------------------------|--------------|--------------|--------------|--------------|--------------|--------------|-------------------------------|--------------|--------------|--------------|--------------|--------------|--------------|
| Random Missing Rate $r = 0$   |              |              |              |              |              |              | Random Missing Rate $r = 0.5$ |              |              |              |              |              |              |
| MISA                          | 40.55        | 63.38        | 78.19        | 77.22        | 0.449        | 0.576        | MISA                          | 30.56        | 54.78        | 71.26        | 64.16        | 0.552        | 0.367        |
| Self-MM                       | 40.77        | 64.92        | 78.26        | 78.00        | <b>0.421</b> | 0.584        | Self-MM                       | 32.02        | 53.90        | 71.41        | 67.11        | 0.517        | 0.390        |
| MMIM                          | 37.42        | 60.69        | 75.42        | 73.10        | 0.475        | 0.528        | MMIM                          | 33.41        | 52.37        | 68.49        | 64.81        | 0.553        | 0.336        |
| CENET                         | 23.85        | 54.05        | 68.71        | 57.82        | 0.578        | 0.137        | CENET                         | 23.12        | 54.05        | 68.71        | 57.92        | 0.588        | 0.107        |
| TETFN                         | 41.94        | 65.86        | <b>80.23</b> | 79.25        | 0.424        | 0.589        | TETFN                         | 33.48        | 56.24        | 72.43        | 67.30        | 0.512        | 0.394        |
| TFR-Net                       | 33.85        | 54.12        | 69.15        | 58.44        | 0.562        | 0.254        | TFR-Net                       | 24.65        | 52.37        | 67.47        | 58.66        | 0.685        | 0.171        |
| ALMT                          | 23.41        | 54.78        | 75.64        | 76.27        | 0.527        | 0.536        | ALMT                          | 18.38        | 47.12        | 68.27        | 71.22        | 0.563        | 0.395        |
| LNLN                          | 38.66        | 63.97        | 75.93        | <b>79.89</b> | 0.458        | 0.570        | LNLN                          | <b>36.40</b> | 57.70        | 72.72        | <b>78.77</b> | 0.513        | 0.412        |
| P-RMF                         | 38.95        | 60.61        | 78.34        | 79.69        | 0.441        | 0.550        | P-RMF                         | 34.79        | 54.83        | <b>73.61</b> | 74.83        | <b>0.495</b> | 0.404        |
| <b>DNRNet</b>                 | <b>42.23</b> | <b>66.28</b> | 79.21        | 79.04        | 0.432        | <b>0.581</b> | <b>DNRNet</b>                 | 35.89        | <b>58.74</b> | 72.73        | 73.39        | 0.504        | <b>0.439</b> |
| Random Missing Rate $r = 0.1$ |              |              |              |              |              |              | Random Missing Rate $r = 0.6$ |              |              |              |              |              |              |
| MISA                          | 38.88        | 63.02        | 77.39        | 75.82        | 0.461        | 0.561        | MISA                          | 27.72        | 53.97        | 70.46        | 61.81        | 0.578        | 0.286        |
| Self-MM                       | 40.26        | 63.53        | 77.32        | 76.76        | 0.433        | 0.563        | Self-MM                       | 29.10        | 51.86        | 70.02        | 64.21        | 0.548        | 0.313        |
| MMIM                          | 37.27        | 60.90        | 74.25        | 72.08        | 0.473        | 0.529        | MMIM                          | 29.18        | 49.31        | 67.91        | 63.86        | 0.578        | 0.270        |
| CENET                         | 22.83        | 53.98        | 68.57        | 57.36        | 0.580        | 0.136        | CENET                         | 22.46        | 53.69        | 69.00        | 58.64        | 0.592        | 0.102        |
| TETFN                         | 41.36        | 64.62        | 78.92        | 77.70        | <b>0.432</b> | <b>0.578</b> | TETFN                         | 29.90        | 53.54        | 70.97        | 64.19        | 0.545        | 0.309        |
| TFR-Net                       | 30.12        | 53.25        | 68.85        | 59.38        | 0.596        | 0.203        | TFR-Net                       | 24.80        | 52.59        | 67.03        | 58.30        | 0.696        | 0.157        |
| ALMT                          | 22.10        | 55.14        | 74.40        | 75.19        | 0.530        | 0.537        | ALMT                          | 18.67        | 43.69        | 66.81        | 70.69        | 0.574        | 0.322        |
| LNLN                          | 38.51        | 62.73        | 76.29        | <b>80.07</b> | 0.458        | 0.562        | LNLN                          | 33.70        | 54.63        | 71.55        | <b>79.56</b> | 0.535        | 0.352        |
| P-RMF                         | 37.72        | 59.52        | 77.24        | 78.88        | 0.454        | 0.530        | P-RMF                         | <b>33.92</b> | 53.03        | <b>72.12</b> | 73.32        | 0.515        | 0.383        |
| <b>DNRNet</b>                 | <b>41.79</b> | <b>65.43</b> | <b>78.77</b> | 79.18        | 0.434        | 0.566        | <b>DNRNet</b>                 | 32.83        | <b>56.89</b> | 71.77        | 72.04        | <b>0.508</b> | <b>0.394</b> |
| Random Missing Rate $r = 0.2$ |              |              |              |              |              |              | Random Missing Rate $r = 0.7$ |              |              |              |              |              |              |
| MISA                          | 38.15        | 59.23        | 74.33        | 71.70        | 0.489        | 0.490        | MISA                          | 24.87        | 52.52        | 69.95        | 59.54        | 0.601        | 0.167        |
| Self-MM                       | 38.37        | 61.71        | 74.98        | 73.71        | 0.464        | 0.500        | Self-MM                       | 25.53        | 50.62        | 69.58        | 62.28        | 0.571        | 0.198        |
| MMIM                          | 37.27        | 57.33        | 72.36        | 69.80        | 0.504        | 0.460        | MMIM                          | 28.59        | 46.53        | 66.89        | 62.23        | 0.595        | 0.190        |
| CENET                         | 22.25        | 54.20        | 68.57        | 57.64        | 0.583        | 0.132        | CENET                         | 21.81        | 53.32        | 67.69        | 57.87        | 0.599        | 0.070        |
| TETFN                         | 39.46        | 61.56        | 75.49        | 73.59        | <b>0.457</b> | <b>0.527</b> | TETFN                         | 27.86        | 51.06        | 69.29        | 61.09        | 0.572        | 0.190        |
| TFR-Net                       | 29.03        | 53.61        | 68.64        | 59.74        | 0.619        | 0.191        | TFR-Net                       | 23.78        | 52.30        | 67.18        | 58.15        | 0.707        | 0.163        |
| ALMT                          | 21.08        | 53.17        | 72.65        | 73.90        | 0.541        | 0.485        | ALMT                          | 18.02        | 38.66        | 65.57        | 70.27        | 0.586        | 0.218        |
| LNLN                          | 38.88        | 61.78        | 74.76        | <b>78.53</b> | 0.474        | 0.513        | LNLN                          | 30.27        | 51.64        | 69.73        | <b>79.37</b> | 0.558        | 0.261        |
| P-RMF                         | 37.05        | 59.30        | <b>76.23</b> | 77.46        | 0.460        | 0.512        | P-RMF                         | <b>32.23</b> | 52.52        | <b>71.58</b> | 72.22        | <b>0.531</b> | <b>0.369</b> |
| <b>DNRNet</b>                 | <b>41.79</b> | <b>62.06</b> | 75.49        | 76.41        | 0.463        | 0.520        | <b>DNRNet</b>                 | 30.42        | <b>54.39</b> | 70.24        | 77.93        | 0.547        | 0.269        |
| Random Missing Rate $r = 0.3$ |              |              |              |              |              |              | Random Missing Rate $r = 0.8$ |              |              |              |              |              |              |
| MISA                          | 36.40        | 59.3         | 74.11        | 70.40        | 0.505        | 0.464        | MISA                          | 22.69        | 52.22        | 69.37        | 57.82        | 0.610        | 0.092        |
| Self-MM                       | 37.93        | 59.81        | 74.76        | 72.85        | 0.474        | 0.487        | Self-MM                       | 22.03        | 50.77        | 69.51        | 60.68        | 0.585        | 0.138        |
| MMIM                          | 37.71        | 58.06        | 72.36        | 69.52        | 0.512        | 0.436        | MMIM                          | 22.32        | 44.35        | 65.28        | 60.53        | 0.607        | 0.145        |
| CENET                         | 21.44        | 54.05        | 68.42        | 57.41        | 0.578        | 0.175        | CENET                         | 21.73        | 52.15        | 67.47        | 58.44        | 0.599        | 0.074        |
| TETFN                         | 38.80        | 61.92        | <b>75.86</b> | 73.28        | <b>0.463</b> | <b>0.521</b> | TETFN                         | 23.48        | 49.60        | <b>69.88</b> | 60.92        | 0.584        | 0.154        |
| TFR-Net                       | 27.64        | 52.30        | 68.42        | 59.88        | 0.640        | 0.182        | TFR-Net                       | 22.97        | 52.74        | 67.54        | 57.55        | 0.721        | 0.100        |
| ALMT                          | 20.35        | 50.62        | 72.06        | 73.64        | 0.546        | 0.469        | ALMT                          | 18.60        | 34.06        | 64.19        | 69.64        | 0.597        | 0.133        |
| LNLN                          | 38.37        | 60.98        | 74.25        | <b>78.60</b> | 0.478        | 0.509        | LNLN                          | 27.94        | 50.47        | 69.58        | 80.23        | 0.580        | 0.183        |
| P-RMF                         | 36.89        | 56.89        | 75.66        | 75.89        | 0.475        | 0.483        | P-RMF                         | <b>31.07</b> | 49.89        | 69.51        | 70.34        | <b>0.568</b> | <b>0.269</b> |
| <b>DNRNet</b>                 | <b>40.04</b> | <b>62.03</b> | 75.27        | 76.47        | 0.471        | 0.512        | <b>DNRNet</b>                 | 25.16        | <b>54.27</b> | 69.37        | <b>81.91</b> | 0.574        | 0.192        |
| Random Missing Rate $r = 0.4$ |              |              |              |              |              |              | Random Missing Rate $r = 0.9$ |              |              |              |              |              |              |
| MISA                          | 34.86        | 57.33        | 72.87        | 67.52        | 0.523        | 0.436        | MISA                          | 20.64        | 52.95        | 69.22        | 57.01        | 0.617        | 0.041        |
| Self-MM                       | 34.57        | 58.28        | 73.30        | 70.36        | 0.482        | 0.479        | Self-MM                       | 22.17        | 52.15        | 68.92        | 58.32        | 0.586        | 0.111        |
| MMIM                          | 34.57        | 55.36        | 69.95        | 66.49        | 0.533        | 0.399        | MMIM                          | 20.35        | 42.67        | 65.72        | 59.64        | 0.610        | 0.096        |
| CENET                         | 22.54        | 54.12        | 68.49        | 57.68        | 0.583        | 0.141        | CENET                         | 20.86        | 48.07        | 65.72        | 58.18        | 0.609        | -0.002       |
| TETFN                         | 35.81        | 58.93        | 73.81        | 70.66        | 0.473        | <b>0.504</b> | TETFN                         | 22.10        | 45.73        | 68.92        | 58.75        | 0.590        | 0.108        |
| TFR-Net                       | 25.31        | 51.86        | 67.91        | 59.16        | 0.664        | 0.176        | TFR-Net                       | 23.05        | 53.76        | 69.08        | 57.71        | 0.721        | 0.088        |
| ALMT                          | 19.91        | 49.45        | 70.75        | 72.97        | 0.549        | 0.470        | ALMT                          | 19.47        | 26.91        | 66.23        | 73.76        | 0.596        | 0.076        |
| LNLN                          | 37.49        | 60.03        | 73.81        | <b>78.82</b> | 0.491        | 0.481        | LNLN                          | 26.19        | 47.48        | 68.64        | 80.42        | 0.591        | 0.127        |
| P-RMF                         | 36.54        | 55.80        | 75.32        | 76.30        | 0.482        | 0.472        | P-RMF                         | <b>29.10</b> | 45.08        | 66.77        | 67.54        | 0.581        | 0.168        |
| <b>DNRNet</b>                 | <b>39.61</b> | <b>61.04</b> | <b>75.93</b> | 76.68        | <b>0.473</b> | 0.495        | <b>DNRNet</b>                 | 27.35        | <b>54.27</b> | <b>69.37</b> | <b>81.91</b> | <b>0.574</b> | <b>0.188</b> |

MOSI dataset with a missing rate of 0.7, using the mean absolute error (MAE) metric for evaluation, where a lower value indicates better performance. As shown in Figure 7, the MAE gradually decreases as the number of iterations in-

creases from 1 to 3, reaching its global minimum at  $n = 3$ . This suggests that the initial recursive iterations effectively refine the feature representations and reduce prediction errors. However, as  $n$  increases further, the error also in-

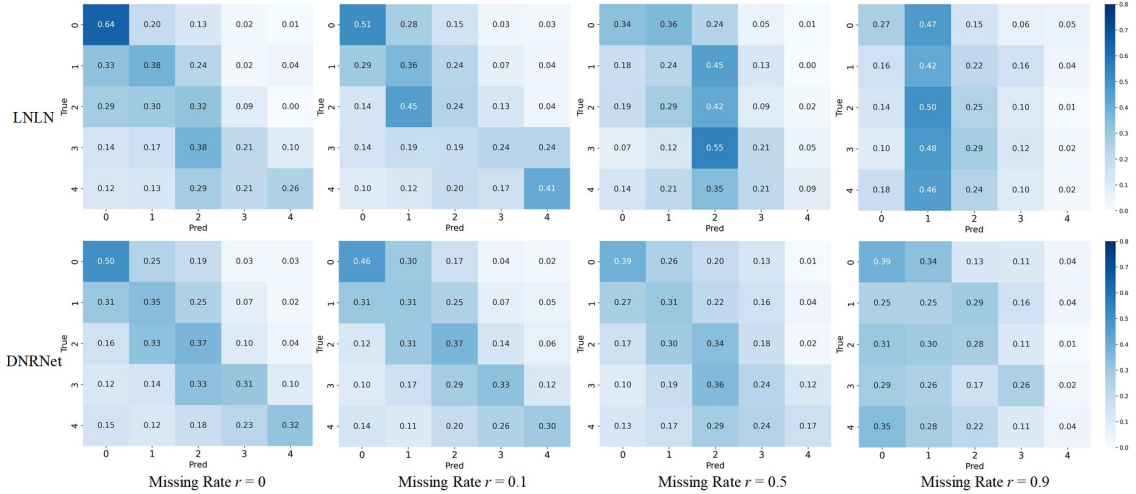

Figure 6. Confusion matrices of DNRNet and the baseline model LNLN on the SIMS dataset. Note: labels 0–4 denote negative, weakly negative, neutral, weakly positive, and positive, respectively.

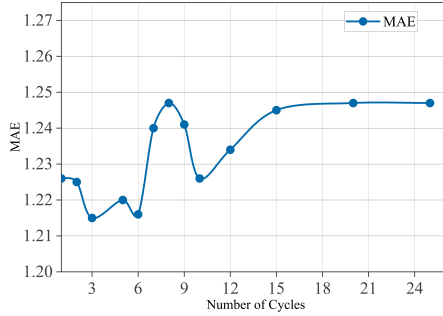

Figure 7. Sensitivity analysis of the cycle number  $n$  on the MOSI dataset under a missing rate of 0.7.

creases, demonstrating that an appropriate number of iterations can enhance feature completion, while excessive iterations may amplify the noise generated in the previous steps and introduce unnecessary interference.

### A.5. Modality-Level Missingness Analysis

As shown in Table 10, DNRNet consistently outperforms all baselines across all six modality-level missing scenarios on the MOSI dataset. Notably, it achieves superior accuracy even in challenging non-verbal cases (V, A), demonstrating strong inference capabilities without the dominant language modality. These results empirically validate that our nested recurrent network effectively compensates for complete modality loss, ensuring stable semantic representation.

### A.6. Validation of Dynamic Recurrent Inference

To further validate that our proposed DNRNet simulates the brain’s dynamic recurrent inference, we quantitatively analyzed the evolution of internal states during the recurrent

Table 10. Acc-2 under modality-level missing conditions on the MOSI dataset. Note: The modalities inside the { } are the present modalities.

| Method        | {V}          | {A}          | {L}          | {V,A}        | {V,L}        | {A,L}        |
|---------------|--------------|--------------|--------------|--------------|--------------|--------------|
| MMIM          | 48.20        | 48.64        | 81.29        | 49.61        | 81.15        | 81.83        |
| CENET         | 51.85        | 51.80        | 81.54        | 51.80        | 81.54        | 81.49        |
| TETFN         | 55.25        | 55.25        | 81.05        | 55.25        | 81.00        | 81.10        |
| ALMT          | 54.96        | 55.10        | 79.83        | 55.05        | 79.98        | 79.98        |
| LNLN          | 49.03        | 49.03        | 82.48        | 49.03        | 82.21        | 82.26        |
| P-RMF         | 56.01        | 56.85        | 81.01        | 58.42        | 82.01        | 82.16        |
| <b>DNRNet</b> | <b>56.79</b> | <b>57.41</b> | <b>84.11</b> | <b>58.86</b> | <b>83.82</b> | <b>84.26</b> |

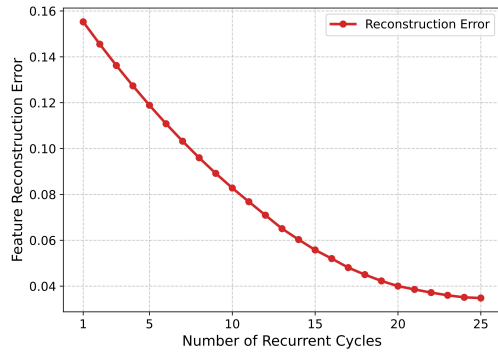

Figure 8. The trend of reconstruction error across recurrent cycles.

completion phase. Specifically, at a 70% missing rate, we evaluated the mean squared error between the reconstructed and ground-truth complete features across each recurrent loop. As shown in Figure 8, the overall reconstruction error demonstrates a consistent and significant monotonic de-

Table 11. Average performance comparison with the tensor completion baseline on the MOSI dataset. Lower MAE indicates better performance.

| Method          | Acc-7        | Acc-5        | Acc-2                | F1                   | MAE          | Corr         |
|-----------------|--------------|--------------|----------------------|----------------------|--------------|--------------|
| DNRNet (Tensor) | 35.27        | <b>39.43</b> | 73.90 / 72.62        | 73.82 / 72.72        | 1.037        | 0.528        |
| <b>DNRNet</b>   | <b>35.36</b> | 39.11        | <b>74.22 / 73.19</b> | <b>74.24 / 73.28</b> | <b>1.036</b> | <b>0.538</b> |

crease. The error converges rapidly in the initial cycles before gradually plateauing. This dynamic behavior confirms that our model effectively mimics the corticothalamic circuit, iteratively accumulating evidence to refine the missing features.

### A.7. Comparison with Tensor Completion Paradigms

To conduct a comprehensive evaluation of our model, we designed a new baseline model that employs the representative mathematical algorithm of low-rank tensor completion to fill in the missing multimodal features. As shown in Table 11, DNRNet achieved superior results. This indicates that the tensor completion algorithm can only restore low-level smooth signals and cannot effectively complete the emotional semantic information. In contrast, by imitating the cortical-thalamic circuit, DNRNet performs dynamic semantic inference and effectively achieves highly accurate feature restoration.

### A.8. Notation Table

For ease of reference, the primary mathematical notations used throughout this paper are summarized in Table 12.

Table 12. Key mathematical notations used in this paper.

| Symbol                                | Description                                                                |
|---------------------------------------|----------------------------------------------------------------------------|
| $m \in \{v, a, l\}$                   | Index for modalities: vision ( $v$ ), audio ( $a$ ), and language ( $l$ ). |
| $U_m \in \mathbb{R}^{T_m \times D_m}$ | The intact modality sequence with full information.                        |
| $X_m \in \mathbb{R}^{T_m \times D_m}$ | The incomplete modality sequence with frame-level missingness.             |
| $T_m, D_m$                            | Sequence length and feature dimensionality for modality $m$ .              |
| $x_m$                                 | Input feature sequence for modality $m$ .                                  |
| $L_m$                                 | Local correction features generated by the Local Recurrent Loop.           |
| $G_m$                                 | Global correction features generated by the Global Recurrent Loop.         |
| $w_m$                                 | Confidence score estimating the reliability of modality $m$ .              |
| $HLI(\cdot)$                          | High-Level Inference Module simulating higher-order cortex.                |
| $LP(\cdot)$                           | Local Perception Module simulating lower-order cortex.                     |
| $CA(\cdot)$                           | Confidence-Aware Module simulating thalamic regulatory function.           |
| $GP(\cdot)$                           | Global Perception Module for cross-modal information integration.          |
| $\mathcal{L}_{task}$                  | The sentiment prediction loss.                                             |
| $\mathcal{L}_{ca}$                    | The confidence-aware loss.                                                 |
| $\mathcal{L}_{rec}$                   | The reconstruction loss.                                                   |
| $\alpha, \beta$                       | Hyperparameters balancing the auxiliary losses.                            |
